# Supplementary material for: Understanding hospital activity and outcomes for people with multimorbidity using electronic health records
Source: Research Square preprint supplement (doi:10.21203/rs.3.rs-5462107/v1), 2025-01-16
Supplement: Supplementary file 1 [file c210f37fdd0c87d31545f3c1.docx]

**SUPPLEMENTARY DATA**

**Understanding hospital activity and outcomes for people with multimorbidity using electronic health records**

**Table S1:** List of 25 high-level long-term conditions summarised from HDRUK CALIBER phenotypes combining primary care and hospital records. The number of phenotypes combined for each long-term condition is shown.

|  | **Number of CALIBER phenotypes combined** |
| --- | --- |
| ***PHYSICAL*** | |
| Cancer | 40 |
| Abdominal Aortic Aneurysm | 2 |
| Atrial Fibrillation | 8 |
| Ischaemic heart disease | 20 |
| Heart Failure | 2 |
| Hypertension | 3 |
| Stroke | 13 |
| Peripheral Vascular Disease | 5 |
| Inflammatory bowel disease | 4 |
| Liver disease | 5 |
| Diabetes | 9 |
| Obesity | 3 |
| Chronic renal disease | 3 |
| Arthritis/Arthropathy | 11 |
| Hip fracture | 4 |
| Osteoporosis | 2 |
| Epilepsy | 2 |
| Progressive neurological disease inc. dementia | 6 |
| Asthma | 2 |
| Bronchiectasis | 1 |
| Chronic Obstructive Pulmonary Disease | 2 |
| Pulmonary fibrosis | 1 |
| ***MENTAL HEALTH*** | |
| Alcohol and substance misuse | 5 |
| Chronic psychiatry disorders | 6 |
| Depression and related disorders | 2 |

**Table S2:** Detailed list of HDRUK CALIBER phenotypes that are combined into the 25 high-level LTC groups listed into Table S1. Each CALIBER phenotype and subcategory may be mapped to multiple GP (Read) or Hospital (ICD-10) codes as per published codelists on the HDRUK Phenotype Library.

| **High-Level LTC Group** | **CALIBER Phenotype Name** | **CALIBER Phenotype Subcategory** |
| --- | --- | --- |
| Abdominal Aortic Aneurysm | Abdominal aortic aneurysm | AAA without leak or rupture |
| Abdominal Aortic Aneurysm | Abdominal aortic aneurysm | AAA without leak or rupture (4) |
| Alcohol and substance misuse | Alcoholic liver disease | Diagnosis of Alcoholic liver disease |
| Alcohol and substance misuse | Alcohol Problems | Diagnosis of Alcohol Problems |
| Alcohol and substance misuse | Alcohol Problems | History of Alcohol Problems |
| Alcohol and substance misuse | Other psychoactive substance misuse | Diagnosis of Other psychoactive substance misuse |
| Alcohol and substance misuse | Other psychoactive substance misuse | History of Other psychoactive substance misuse |
| Arthritis/Arthropathy | Ankylosing spondylitis | Diagnosis of Ankylosing spondylitis |
| Arthritis/Arthropathy | Enteropathic arthropathy | Diagnosis of Enteropathic arthropathy |
| Arthritis/Arthropathy | Juvenile arthritis | Diagnosis of Juvenile arthritis |
| Arthritis/Arthropathy | Osteoarthritis (excl spine) | Diagnosis of Osteoarthritis (excl spine) |
| Arthritis/Arthropathy | Osteoarthritis (excl spine) | History of Osteoarthritis (excl spine) |
| Arthritis/Arthropathy | Psoriatic arthropathy | Diagnosis of Psoriatic arthropathy |
| Arthritis/Arthropathy | Rheumatoid Arthritis | Diagnosis of Rheumatoid Arthritis |
| Arthritis/Arthropathy | Rheumatoid Arthritis | History of Rheumatoid Arthritis |
| Arthritis/Arthropathy | Spinal stenosis | Diagnosis of Spinal stenosis |
| Arthritis/Arthropathy | Spondylolisthesis | Diagnosis of Spondylolisthesis |
| Arthritis/Arthropathy | Spondylolisthesis | Procedure for Spondylolisthesis |
| Asthma | Asthma | Diagnosis of Asthma |
| Asthma | Asthma | History of Asthma |
| Atrial Fibrillation | Atrial fibrillation | Atrial fibrillation monitoring (2) |
| Atrial Fibrillation | Atrial fibrillation | Atrial fibrillation or flutter (6) |
| Atrial Fibrillation | Atrial fibrillation | Atrial fibrillation, not otherwise specified (5) |
| Atrial Fibrillation | Atrial fibrillation | Atrial flutter (7) |
| Atrial Fibrillation | Atrial fibrillation | Fibrillation and flutter |
| Atrial Fibrillation | Atrial fibrillation | History of atrial fibrillation or flutter (1) |
| Atrial Fibrillation | Atrial fibrillation | Paroxysmal atrial fibrillation (3) |
| Atrial Fibrillation | Atrial fibrillation | Persistent or permanent atrial fibrillation (4) |
| Bronchiectasis | Bronchiectasis | Diagnosis of Bronchiectasis |
| Cancer | Hodgkin Lymphoma | Diagnosis of Hodgkin Lymphoma |
| Cancer | Leukaemia | Diagnosis of Leukaemia |
| Cancer | Multiple myeloma and malignant plasma cell neoplasms | Diagnosis of Multiple myeloma and malignant plasma cell neoplasms |
| Cancer | Myelodysplastic syndromes | Diagnosis of Myelodysplastic syndromes |
| Cancer | Non-Hodgkin Lymphoma | Diagnosis of Non-Hodgkin Lymphoma |
| Cancer | Primary Malignancy_biliary tract | Diagnosis of Primary Malignancy_biliary tract |
| Cancer | Primary Malignancy_Bladder | Diagnosis of Primary Malignancy_Bladder |
| Cancer | Primary Malignancy_Bone and articular cartilage | Diagnosis of Primary Malignancy_Bone and articular cartilage |
| Cancer | Primary Malignancy_Brain, Other CNS and Intracranial | Diagnosis of Primary Malignancy_Brain, Other CNS and Intracranial |
| Cancer | Primary Malignancy_Breast | Diagnosis of Primary Malignancy_Breast |
| Cancer | Primary Malignancy_Cervical | Diagnosis of Primary Malignancy_Cervical |
| Cancer | Primary Malignancy_colorectal and anus | Diagnosis of Primary Malignancy_colorectal and anus |
| Cancer | Primary Malignancy_Kidney and Ureter | Diagnosis of Primary Malignancy_Kidney and Ureter |
| Cancer | Primary Malignancy_Liver | Diagnosis of Primary Malignancy_Liver |
| Cancer | Primary Malignancy_Lung and trachea | Diagnosis of Primary Malignancy_Lung and trachea |
| Cancer | Primary Malignancy_Malignant Melanoma | Diagnosis of Primary Malignancy_Malignant Melanoma |
| Cancer | Primary Malignancy_Mesothelioma | Diagnosis of Primary Malignancy_Mesothelioma |
| Cancer | Primary Malignancy_Multiple independent sites | Diagnosis of Primary Malignancy_Multiple independent sites |
| Cancer | Primary Malignancy_Oesophageal | Diagnosis of Primary Malignancy_Oesophageal |
| Cancer | Primary Malignancy_Oro-pharyngeal | Diagnosis of Primary Malignancy_Oro-pharyngeal |
| Cancer | Primary Malignancy_Other Organs | Diagnosis of Primary Malignancy_Other Organs |
| Cancer | Primary Malignancy_Other Organs | Possible Diagnosis of Primary Malignancy_Other Organs |
| Cancer | Primary Malignancy_Ovarian | Diagnosis of Primary Malignancy_Ovarian |
| Cancer | Primary Malignancy_Pancreatic | Diagnosis of Primary Malignancy_Pancreatic |
| Cancer | Primary Malignancy_Prostate | Diagnosis of Primary Malignancy_Prostate |
| Cancer | Primary Malignancy_Stomach | Diagnosis of Primary Malignancy_Stomach |
| Cancer | Primary Malignancy_Testicular | Diagnosis of Primary Malignancy_Testicular |
| Cancer | Primary Malignancy_Thyroid | Diagnosis of Primary Malignancy_Thyroid |
| Cancer | Primary Malignancy_Uterine | Diagnosis of Primary Malignancy_Uterine |
| Cancer | Secondary Malignancy_Adrenal gland | Diagnosis of Secondary Malignancy_Adrenal gland |
| Cancer | Secondary Malignancy_Bone | Diagnosis of Secondary Malignancy_Bone |
| Cancer | Secondary Malignancy_Bowel | Diagnosis of Secondary Malignancy_Bowel |
| Cancer | Secondary Malignancy_Brain, Other CNS and Intracranial | Diagnosis of Secondary Malignancy_Brain, Other CNS and Intracranial |
| Cancer | Secondary malignancy_Liver and intrahepatic bile duct | Diagnosis of Secondary malignancy_Liver and intrahepatic bile duct |
| Cancer | Secondary Malignancy_Lung | Diagnosis of Secondary Malignancy_Lung |
| Cancer | Secondary Malignancy_Lymph Nodes | Diagnosis of Secondary Malignancy_Lymph Nodes |
| Cancer | Secondary Malignancy_Other organs | Diagnosis of Secondary Malignancy_Other organs |
| Cancer | Secondary Malignancy_Other organs | Possible diagnosis of Secondary Malignancy_Other organs |
| Cancer | Secondary Malignancy_Pleura | Diagnosis of Secondary Malignancy_Pleura |
| Cancer | Secondary Malignancy_retroperitoneum and peritoneum | Diagnosis of Secondary Malignancy_retroperitoneum and peritoneum |
| Chronic Obstructive Pulmonary Disease | Chronic Obstructive Pulmonary Disease (COPD) | Diagnosis of COPD |
| Chronic Obstructive Pulmonary Disease | Chronic Obstructive Pulmonary Disease (COPD) | History of COPD |
| Chronic psychiatric disorders | Anorexia and bulimia nervosa | Diagnosis of Anorexia and bulimia nervosa |
| Chronic psychiatric disorders | Autism and Asperger's syndrome | Diagnosis of Autism and Asperger's syndrome |
| Chronic psychiatric disorders | Bipolar affective disorder and mania | Diagnosis of Bipolar affective disorder and mania |
| Chronic psychiatric disorders | Bipolar affective disorder and mania | History of Bipolar affective disorder and mania |
| Chronic psychiatric disorders | Schizophrenia, schizotypal and delusional disorders | Diagnosis of Schizophrenia, schizotypal and delusional disorders |
| Chronic psychiatric disorders | Schizophrenia, schizotypal and delusional disorders | History of Schizophrenia, schizotypal and delusional disorders |
| Depression and related disorders | Depression | Diagnosis of Depression |
| Depression and related disorders | Depression | History of Depression |
| Diabetes | Diabetes | Diabetes not otherwise specified (6) |
| Diabetes | Diabetes | Insulin dependent diabetes (3) |
| Diabetes | Diabetes | Non insulin dependent diabetes (4) |
| Diabetes | Diabetes | Secondary diabetes (5) |
| Diabetes | Diabetes | Type I diabetes mellitus (3) |
| Diabetes | Diabetes | Type II diabetes mellitus (4) |
| Diabetes | Diabetic ophthalmic complications | Diagnosis of diabetic ophthalmic complications |
| Diabetes | Diabetic neurological complications | Diagnosis of diabetic neurological complications |
| Diabetes | Diabetic neurological complications | History of diabetic neurological complications |
| Epilepsy | Epilepsy | Diagnosis of Epilepsy |
| Epilepsy | Epilepsy | History of Epilepsy |
| Heart Failure | Heart failure | Diagnosis of Heart failure |
| Heart Failure | Heart failure | History of Heart failure |
| Hip fracture | Fracture of hip | Diagnosis of Fracture of hip |
| Hip fracture | Fracture of hip | History of Fracture of hip |
| Hip fracture | Fracture of hip | Procedure for Fracture of hip |
| Hip fracture | Fracture of hip | Procedure for Fracture of the hip |
| Hypertension | Hypertension | History of hypertension (1) |
| Hypertension | Hypertension | Hypertension (3) |
| Hypertension | Hypertension | Secondary hypertension (4) |
| Inflammatory Bowel Disease | Crohn's disease | Diagnosis of Crohn's disease |
| Inflammatory Bowel Disease | Crohn's disease | History of Crohn's disease |
| Inflammatory Bowel Disease | Ulcerative colitis | Diagnosis of Ulcerative colitis |
| Inflammatory Bowel Disease | Ulcerative colitis | History of Ulcerative colitis |
| Ischaemic Heart Disease | Coronary heart disease not otherwise specified | Diagnosed |
| Ischaemic Heart Disease | Coronary heart disease not otherwise specified | Diagnosed (3) |
| Ischaemic Heart Disease | Coronary heart disease not otherwise specified | History of (1) |
| Ischaemic Heart Disease | Myocardial infarction | Acute MI not further specified (5) |
| Ischaemic Heart Disease | Myocardial infarction | Complications of MI (7) |
| Ischaemic Heart Disease | Myocardial infarction | History of MI (1) |
| Ischaemic Heart Disease | Myocardial infarction | NSTEMI (4) |
| Ischaemic Heart Disease | Myocardial infarction | Possible MI or uncertain date (2) |
| Ischaemic Heart Disease | Myocardial infarction | STEMI (3) |
| Ischaemic Heart Disease | Myocardial infarction | Subsequent MI (6) |
| Ischaemic Heart Disease | Stable angina | CABG Performed (2) |
| Ischaemic Heart Disease | Stable angina | Chest pain, attributed to coronary causes (4) |
| Ischaemic Heart Disease | Stable angina | History of stable angina (1) |
| Ischaemic Heart Disease | Stable angina | PCI performed (2) |
| Ischaemic Heart Disease | Stable angina | Stable angina (4) |
| Ischaemic Heart Disease | Stable angina | Stable angina admission (4) |
| Ischaemic Heart Disease | Unstable Angina | ACS diagnosed (3) |
| Ischaemic Heart Disease | Unstable Angina | Unstable angina (3) |
| Ischaemic Heart Disease | Unstable Angina | Worsening angina (2) |
| Ischaemic Heart Disease | Unstable Angina | yes (1) |
| Liver disease | Hepatic failure | Diagnosis of Hepatic failure |
| Liver disease | Liver fibrosis, sclerosis and cirrhosis | Diagnosis of Liver fibrosis, sclerosis and cirrhosis |
| Liver disease | Oesophageal varices | Diagnosis of Oesophageal varices |
| Liver disease | Oesophageal varices | Procedure for Oesophageal varices |
| Liver disease | Portal hypertension | Diagnosis of Portal hypertension |
| Obesity | Obesity | Diagnosis of Obesity |
| Obesity | Obesity | History of Obesity |
| Obesity | Obesity | Procedure for Obesity |
| Osteoporosis | Osteoporosis | Diagnosis of Osteoporosis |
| Osteoporosis | Osteoporosis | History of Osteoporosis |
| Peripheral Vascular Disease | Peripheral arterial disease | history of PVD during a consultation |
| Peripheral Vascular Disease | Peripheral arterial disease | Leg or aortic embolism or thrombosis (8) |
| Peripheral Vascular Disease | Peripheral arterial disease | Other PAD procedures (3) |
| Peripheral Vascular Disease | Peripheral arterial disease | PAD procedure performed (3) |
| Peripheral Vascular Disease | Peripheral arterial disease | Peripheral vascular disease (7) |
| Progressive neurological disease | Motor neuron disease | Diagnosis of Motor neuron disease |
| Progressive neurological disease | Motor neuron disease | History of Motor neuron disease |
| Progressive neurological disease | Parkinson's disease | Diagnosis of Parkinson's disease |
| Progressive neurological disease | Parkinson's disease | History of Parkinson's disease |
| Progressive neurological disease | Dementia | Diagnosis of Dementia |
| Progressive neurological disease | Dementia | History of Dementia |
| Pulmonary fibrosis | Other interstitial pulmonary diseases with fibrosis | Diagnosis of Other interstitial pulmonary diseases with fibrosis |
| Renal disease | End stage renal disease | Diagnosis of End stage renal disease |
| Renal disease | End stage renal disease | Procedure for End stage renal disease |
| Renal disease | Glomerulonephritis | Diagnosis of Glomerulonephritis |
| Stroke | Intracerebral haemorrhage | Diagnosis of Intracerebral haemorrhage |
| Stroke | Intracerebral haemorrhage | History of Intracerebral haemorrhage |
| Stroke | Ischaemic stroke | Diagnosis of Ischaemic stroke |
| Stroke | Ischaemic stroke | History of cerebral infarction |
| Stroke | Ischaemic stroke | History of Ischaemic stroke |
| Stroke | Stroke NOS | Diagnosis of Stroke NOS |
| Stroke | Stroke NOS | History of Stroke NOS |
| Stroke | Stroke NOS | History of stroke, not specified as haemorrhage or infarction |
| Stroke | Subarachnoid haemorrhage | Diagnosis of subarachnoid ahemorrhage |
| Stroke | Subarachnoid haemorrhage | History of subarachnoid ahemorrhage |
| Stroke | Subarachnoid haemorrhage | History of subarachnoid haemorrhage |
| Stroke | Transient ischaemic attack | Diagnosis of TIA |
| Stroke | Transient ischaemic attack | History of TIA |

**Table S3:** Logistic regression model evaluation summary for emergency readmission risk at 30 days. ROC-AUC scores were used to estimate discrimination power. The 95% confidence intervals were estimated over 1000 bootstrapping iterations with the DeLong method. P-values relative to the individual differences between ROC-AUCs were generated using a two-tailed DeLong z-statistic. Degrees of multicollinearity per variable were measured using the Variance Inflation Factor (VIF). +Refers to the variable indicating No multimorbidity, Simple multimorbidity or High-count multimorbidity. *Health contacts group defined as quantile-based ordinal variable in three categories – Low: 1 to 4 contacts; Medium: 5 to 12 contacts; High: >12 contacts. ROC-AUC – Receiver Operating Characteristic Area-under-the-curve. HL χ2 – Hosmer-Lemeshow chi-squared statistic for goodness of fit. AIC – Akaike Information Criterion, BIC – Bayesian Information Criterion, VIF – Variance Inflation Factor.

|  | 30-day Emergency Readmission | | | | | | VIF | |
| --- | --- | --- | --- | --- | --- | --- | --- | --- |
|  | **ROC-AUC (95% CI)** | **Model reference** | **z** | **p** | **AIC** | **BIC** |
| Model 1 | 0.548  [0.542, 0.553] |  |  |  | 69,841 | 69,879 | Age  Sex (Women)  SIMD | 2.27  1.91  1.91 |
| Model 2 | 0.564  [0.559, 0.569] | Model 1 | 1.26 | 0.21 | 69,641 | 69,688 | Age  Sex (Women)  SIMD  Length of stay | 2.71  1.91  1.95  1.77 |
| Model 3 | 0.577  [0.572, 0.582] | Model 1 | 2.26 | 0.02 | 69,365 | 69,422 | Age  Sex (Women)  SIMD  Length of stay  Multimorbidity group+ | 3.68  1.94  2.30  1.80  3.80 |
| Model 2 | 1.02 | 0.31 |
| Model 4 | 0.568  [0.563, 0.574] | Model 1 | 1.59 | 0.11 | 69,530 | 69,586 | Age  Sex (Women)  SIMD  Length of stay  High-count MM (Y) | 3.10  1.96  2.38  1.79  3.04 |
| Model 2 | 0.35 | 0.73 |
| Model 5 | 0.578  [0.572, 0.583] | Model 1 | 2.30 | 0.02 | 69,356 | 69,422 | Age  Sex (Women)  SIMD  Length of stay  Multimorbidity group+  Health contacts group* | 3.87  1.95  2.33  3.44  3.82  4.41 |
| Model 2 | 1.07 | 0.28 |
| Model 3 | 0.05 | 0.96 |
| Model 6 | 0.569  [0.564, 0.574] | Model 1 | 2.31 | 0.02 | 69,520 | 69,586 | Age  Sex (Women)  SIMD  Length of stay  High-count MM (Y)  Health contacts group* | 3.31  1.97  2.40  3.44  3.07  4.42 |
| Model 2 | 0.41 | 0.68 |
| Model 4 | 0.07 | 0.95 |

**Table S4:** Multivariable logistic regression for associations with emergency 30-day ED reattendance. Data presented as adjusted odds ratios (aOR) with 95% confidence intervals (CI). Sequential addition of variables from a base model of age, sex and SIMD (Model 1) to include length of stay (Model 2), multimorbidity group (Model 3 for count, Model 4 for physical-mental) and care provider contacts (Model 5 adding to count, Model 6 adding to physical-mental multimorbidity).

| Characteristic | Model 1 | | Model 2 | | Model 3 | | Model 4 | | Model 5 | | Model 6 | |
| --- | --- | --- | --- | --- | --- | --- | --- | --- | --- | --- | --- | --- |
| **AOR** | **p** | **AOR** | **p** | **AOR** | **p** | **AOR** | **p** | **AOR** | **p** | **AOR** | **p** |
| Age at index admission | | | | | | | | | | | | |
| Per Year | 1.008  [1.006, 1.009] | <0.001 | 1.008  [1.006, 1.009] | <0.001 | 1.005  [1.003, 1.006] | <0.001 | 1.005  [1.003, 1.006] | <0.001 | 1.003  [1.002, 1.005] | <0.001 | 1.005  [1.004, 1.007] | <0.001 |
| Sex | | | | | | | | | | | | |
| Men | 1.000 (ref) |  | 1.000 (ref) |  | 1.000 (ref) |  | 1.000 (ref) |  | 1.000 (ref) |  | 1.000 (ref) |  |
| Women | 0.962  [0.927, 0.999] | 0.05 | 0.963  [0.927, 1.000] | 0.05 | 0.959  [0.923, 0.995] | 0.03 | 0.959  [0.923, 0.995] | 0.03 | 0.958  [0.923, 0.995] | 0.03 | 0.958  [0.922, 0.994] | 0.02 |
| SIMD in quintiles | | | | | | | | | | | | |
| 1 (most deprived) | 1.132  [1.067, 1.202] | <0.001 | 1.132  [1.067, 1.202] | <0.001 | 1.074 [1.011,1.141] | 0.02 | 1.094  [1.030, 1.162] | 0.003 | 1.075  [1.012, 1.141] | 0.02 | 1.094  [1.030, 1.162] | 0.003 |
| 2-4 | 1.042  [0.996, 1.090] | 0.07 | 1.042 [0.996, 1.090] | 0.07 | 1.012  [0.967, 1.059] | 0.61 | 1.024  [0.979, 1.071] | 0.30 | 1.011  [0.966, 1.058] | 0.64 | 1.023  [0.978, 1.070] | 0.32 |
| 5 (least deprived) | 1.000 (ref) |  | 1.000 (ref) |  | 1.000 (ref) |  | 1.000 (ref) |  | 1.000 (ref) |  | 1.000 (ref) |  |
| Length of stay | | | | | | | | | | | | |
| >3 days+ |  |  | 1.163 [1.119, 1.209] | <0.001 | 1.137  [1.094, 1.182] | <0.001 | 1.172  [1.125, 1.222] | <0.001 | 1.148  [1.087, 1.212] | <0.001 | 1.155  [1.094, 1.220] | <0.001 |
| Multimorbidity group | | | | | | | | | | | | |
| None |  |  |  |  | 1.000 (ref) |  | 1.000 (ref) |  | 1.000 (ref) |  | 1.000 (ref) |  |
| Simple |  |  |  |  | 1.267  [1.191, 1.347] | <0.001 |  |  | 1.251  [1.177, 1.331] | <0.001 |  |  |
| High-count |  |  |  |  | 1.596  [1.505, 1.693] | <0.001 |  |  | 1.561  [1.471, 1.656] | <0.001 |  |  |
| Physical-mental |  |  |  |  |  |  | 1.507  [1.419, 1.600] | <0.001 |  |  | 1.480  [1.393, 1.571] | <0.001 |
| Care provider contacts of any type during index admission | | | | | | | | | | | | |
| 1-4 |  |  |  |  |  |  |  |  | 1.000 (ref) |  | 1.000 (ref) |  |
| 5-12 |  |  |  |  |  |  |  |  | 1.066  [1.017, 1.118] | 0.01 | 1.069  [1.019, 1.121] | 0.01 |
| >12 |  |  |  |  |  |  |  |  | 1.001  [0.938, 1.068] | 0.98 | 1.002  [0.940, 1.069] | 0.94 |

*Dichotomisation at whole population median value
